# Supplementary material for: Sex-biased gene expression in the brown alga Fucus vesiculosus
Source: PubMed Central journal article supplement (PMC3652789; doi:10.1186/1471-2164-14-294), 2013-05-01
Supplement: 1471-2164-14-294-S2.pdf [file 1471-2164-14-294-S2.pdf]

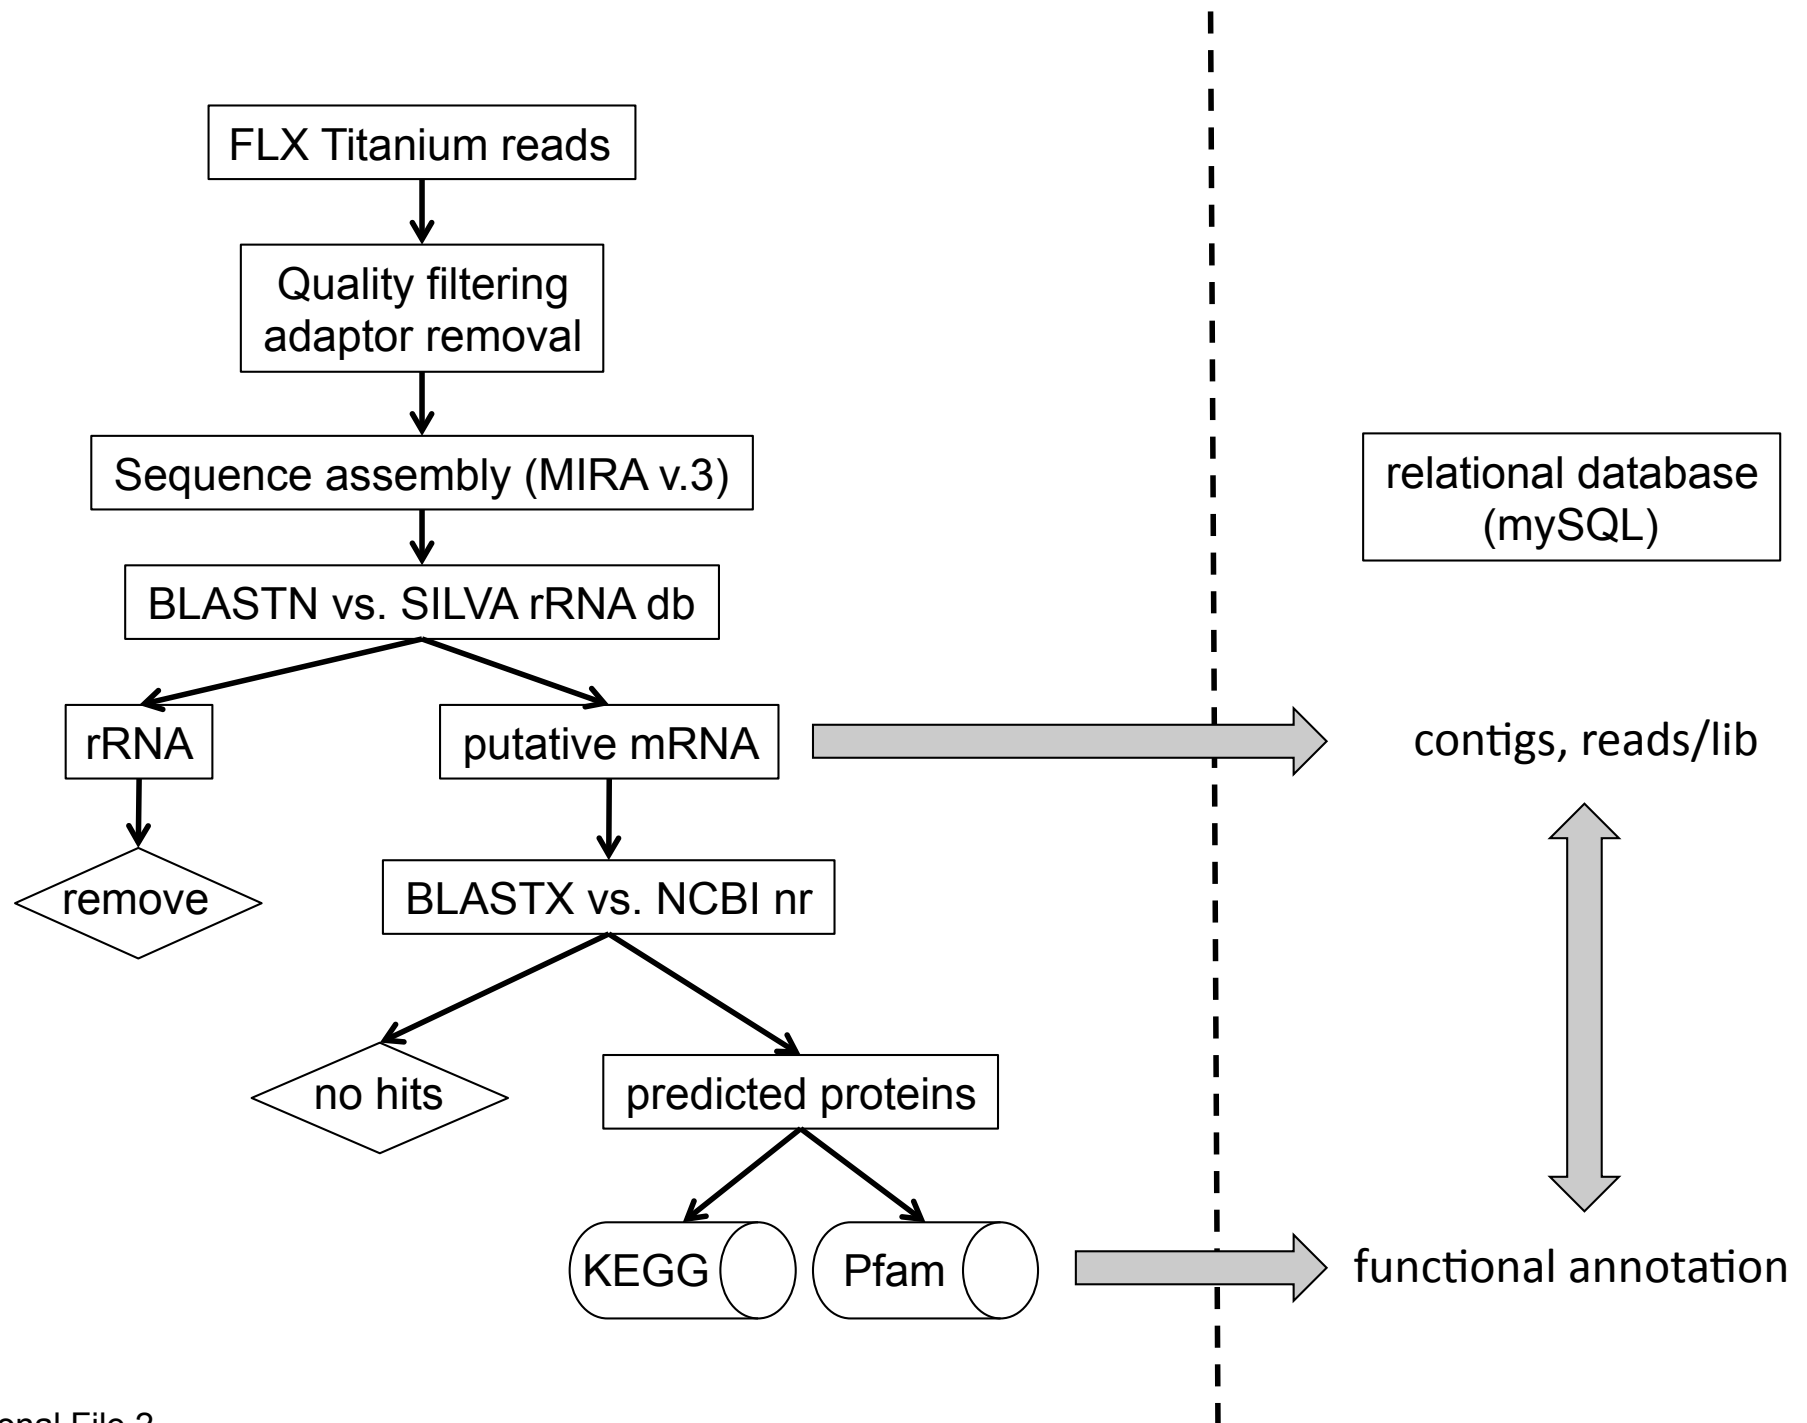

Additional File 2.

Flow-diagram showing the workflow for sequence quality assessment, assembly, annotation, and simple database structure.
